# Supplementary material for: Photoinduced and dark complexation of unsaturated viologen analogues containing two ammonium tails with cucurbit[8]uril
Source: Royal Society of Chemistry journal article supplement (doi:10.1039/b511456j), 2006-01-01
Supplement: b511456j.pdf [file b511456j.pdf]

**Table 1S.** Crystal data, data collection, structure solution and refinement parameters for **4a** and **4b**.

| Data                                                   | <b>4a</b>                                                               | <b>4b</b>                                                                                                 |
|--------------------------------------------------------|-------------------------------------------------------------------------|-----------------------------------------------------------------------------------------------------------|
| Empirical formula                                      | C <sub>48</sub> H <sub>52.26</sub> ClN <sub>32</sub> O <sub>21.63</sub> | C <sub>98</sub> H <sub>123</sub> Br <sub>1.53</sub> Cl <sub>2.47</sub> N <sub>52</sub> O <sub>43.38</sub> |
| Formula weight                                         | 1459.01                                                                 | 2933.39                                                                                                   |
| Crystal size, mm                                       | 0.26 × 0.14 × 0.14                                                      | 0.42 × 0.18 × 0.12                                                                                        |
| Crystal system                                         | Tetragonal                                                              | Monoclinic                                                                                                |
| Space group                                            | <i>P</i> 4 <sub>2</sub> / <i>ncm</i>                                    | <i>P</i> 2 <sub>1</sub> / <i>n</i>                                                                        |
| <i>a</i> , Å                                           | 26.2548(8)                                                              | 15.5210(7)                                                                                                |
| <i>b</i> , Å                                           | 26.2548(8)                                                              | 25.5665(11)                                                                                               |
| <i>c</i> , Å                                           | 12.7555(5)                                                              | 32.4483(14)                                                                                               |
| $\beta$ , deg                                          |                                                                         | 101.039(2)                                                                                                |
| <i>V</i> , Å <sup>3</sup>                              | 8792.6(5)                                                               | 12637.8(10)                                                                                               |
| <i>Z</i>                                               | 4                                                                       | 4                                                                                                         |
| Density (calc.), g/cm <sup>3</sup>                     | 1.102                                                                   | 1.542                                                                                                     |
| $\mu$ (MoK $\alpha$ ), mm <sup>-1</sup>                | 0.121                                                                   | 0.658                                                                                                     |
| Temperature, K                                         | 120.0(2)                                                                | 120.0(2)                                                                                                  |
| $\theta$ range, deg                                    | 1.10 to 27.00                                                           | 1.02 to 28.00                                                                                             |
| Index ranges                                           | -33 ≤ <i>h</i> ≤ 30<br>-33 ≤ <i>k</i> ≤ 30<br>-16 ≤ <i>l</i> ≤ 16       | -20 ≤ <i>h</i> ≤ 20<br>-33 ≤ <i>k</i> ≤ 33<br>-42 ≤ <i>l</i> ≤ 42                                         |
| Refl. collected                                        | 60288                                                                   | 150412                                                                                                    |
| Independent refl.                                      | 4966 [ <i>R</i> (int) = 0.0964]                                         | 30519 [ <i>R</i> (int) = 0.2618]                                                                          |
| Data/parameters                                        | 4966 / 266                                                              | 30519 / 1679                                                                                              |
| Goodness-of-fit on F <sup>2</sup>                      | 1.941                                                                   | 0.921                                                                                                     |
| Final <i>R</i> s [ <i>I</i> > 2 $\sigma$ ( <i>I</i> )] | <i>R</i> <sub>1</sub> = 0.1903,<br><i>wR</i> <sub>2</sub> = 0.4958      | <i>R</i> <sub>1</sub> = 0.1253,<br><i>wR</i> <sub>2</sub> = 0.3255                                        |
| <i>R</i> s (all data)                                  | <i>R</i> <sub>1</sub> = 0.2546,<br><i>wR</i> <sub>2</sub> = 0.5266      | <i>R</i> <sub>1</sub> = 0.3045,<br><i>wR</i> <sub>2</sub> = 0.3702                                        |
| Largest diff. peak and hole, e·Å <sup>-3</sup>         | 2.063 and -0.589                                                        | 1.773 and -1.773                                                                                          |

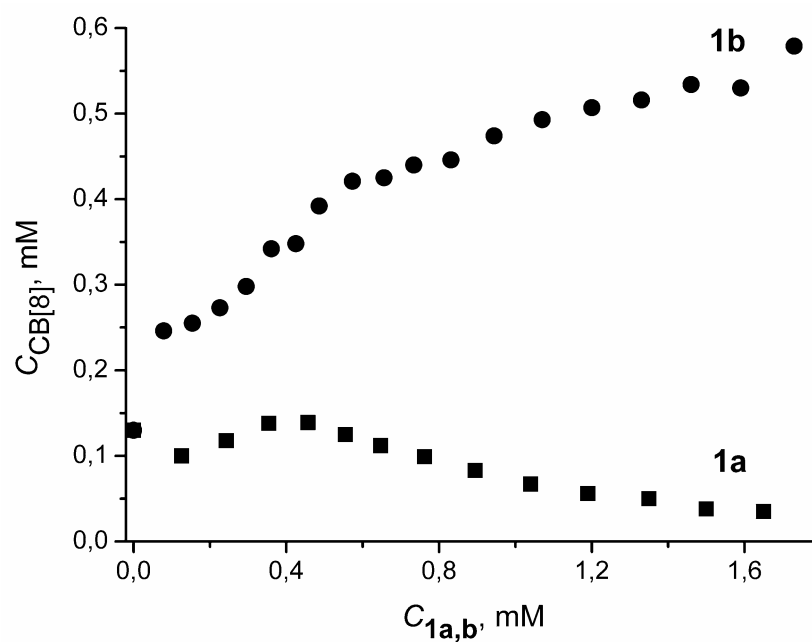

**Fig. 1S.** Dependence of the CB[8] solubility on **1a,b** concentration in  $D_2O/CD_3CN$  (10 : 1) at 30°C.

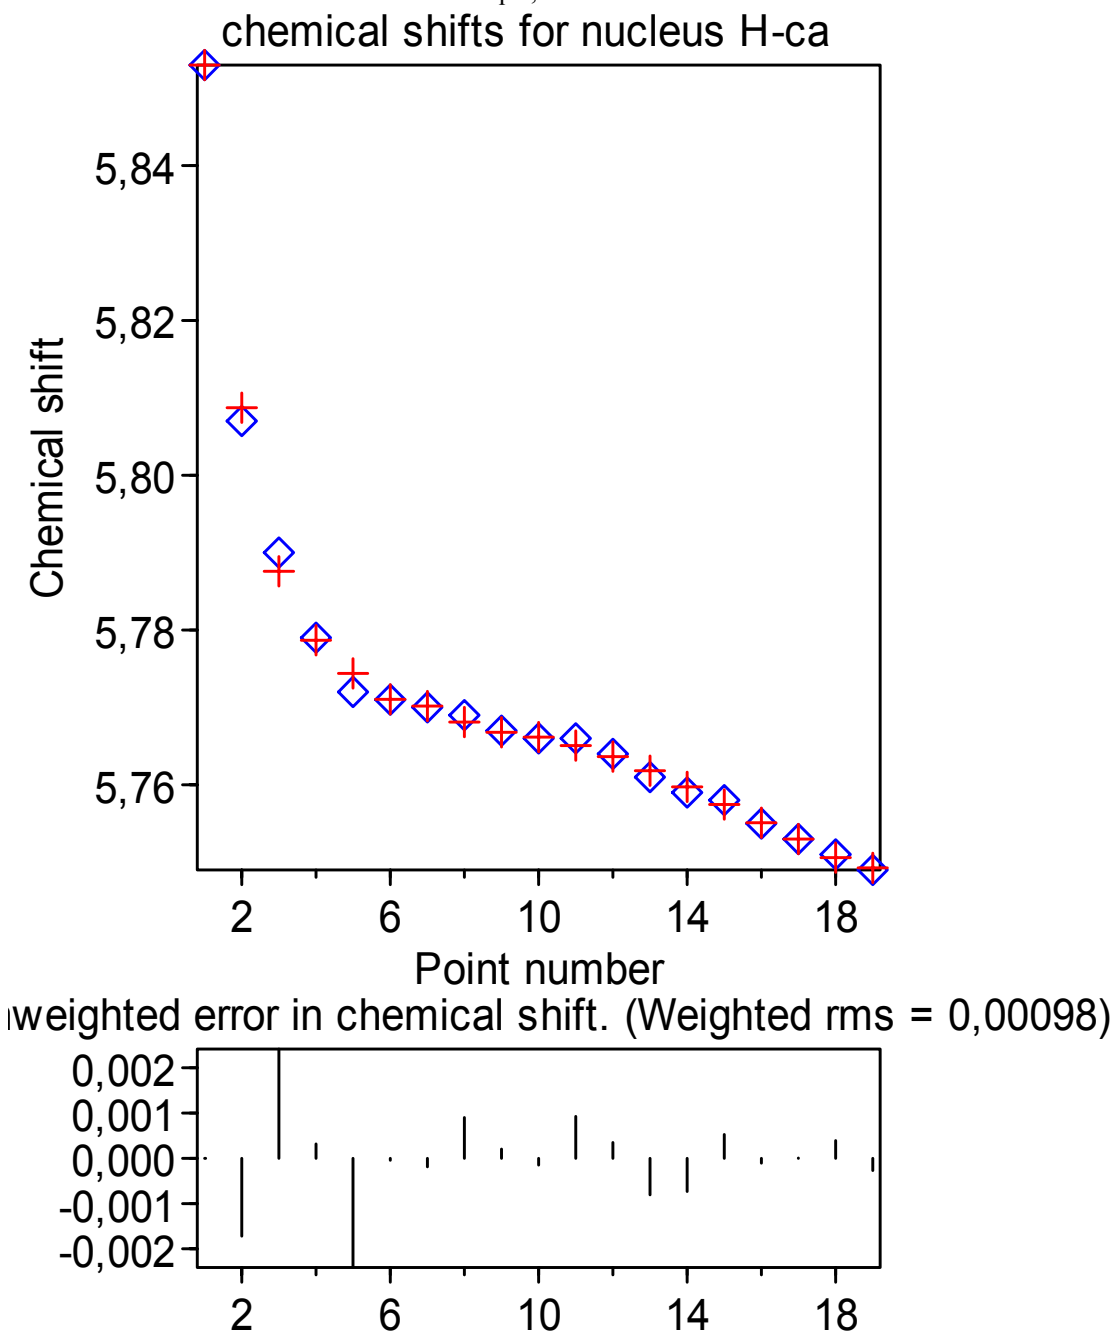

**Fig. 2S.** The HYPNMR plot of  $^1\text{H}$  NMR titration in the  $\text{CB}[8]/(E)\text{-1b}$  system. Blue rhombs show the dependence of  $\delta_{\text{H}}$  of the low-field  $\text{CH}_2$  signals of  $\text{CB}[8]$  on amount of added **1b** and red crosses – the best fit to the system of three equilibria with stability constants  $\lg K_{1:1} = 4.6$ ,  $\lg K_{2:1} = 3.2$ , and  $\lg K_{1:2} = 3.0$ .

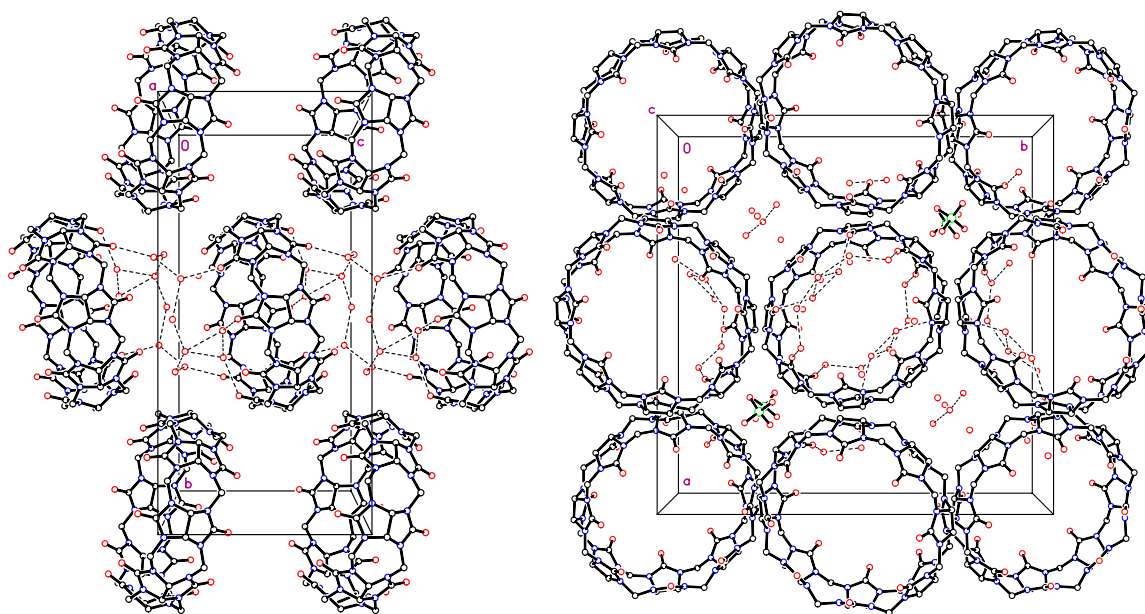

**Fig. 3S.** Two different projections of crystal packing of **4a**.
